# Supplementary material for: Plant species identity and mycorrhizal type explain the root-associated fungal pathogen community assembly of seedlings based on functional traits in a subtropical forest
Source: Front Plant Sci. 2023 Oct 27;14:1251934. doi: 10.3389/fpls.2023.1251934 (PMC10641815; doi:10.3389/fpls.2023.1251934)
Supplement: Supplementary file 2 [file DataSheet_2.xlsx]

## Sheet: Putative fungal pathogens
Species	Taxonomy	Genus	Taxon.Level	Trophic.Mode	Guild	Confidence.Ranking	Growth.Morphology	Trait	Notes	Citation.Source
Amauroderma_calcigenum	k__Fungi;p__Basidiomycota;c__Agaricomycetes;o__Polyporales;f__Ganodermataceae;g__Amauroderma;s__Amauroderma_calcigenum;	Amauroderma	13	Pathotroph-Saprotroph	Plant Pathogen	Probable	NULL	White Rot	NULL	Tedersoo L, et al. 2014. Science 346:1256688
Amauroderma_rugosum	k__Fungi;p__Basidiomycota;c__Agaricomycetes;o__Polyporales;f__Ganodermataceae;g__Amauroderma;s__Amauroderma_rugosum;	Amauroderma	13	Pathotroph-Saprotroph	Plant Pathogen	Probable	NULL	White Rot	NULL	Tedersoo L, et al. 2014. Science 346:1256688
Anthostoma_gastrinum	k__Fungi;p__Ascomycota;c__Sordariomycetes;o__Xylariales;f__Diatrypaceae;g__Anthostoma;s__Anthostoma_gastrinum;	Anthostoma	13	Pathotroph	Plant Pathogen	Probable	NULL	NULL	NULL	Tedersoo L, et al. 2014. Science 346:1256688
Anthracocystis_flocculosa	k__Fungi;p__Basidiomycota;c__Ustilaginomycetes;o__Ustilaginales;f__Ustilaginaceae;g__Anthracocystis;s__Anthracocystis_flocculosa;	Anthracocystis	13	Pathotroph	Plant Pathogen	Probable	Facultative Yeast	NULL	NULL	Tedersoo L, et al. 2014. Science 346:1256688
Ascochyta_pisi	k__Fungi;p__Ascomycota;c__Dothideomycetes;o__Pleosporales;f__Didymellaceae;g__Ascochyta;s__Ascochyta_pisi;	Ascochyta	13	Pathotroph	Plant Pathogen	Probable	NULL	NULL	NULL	Tedersoo L, et al. 2014. Science 346:1256688
Aspergillus_aculeatus	k__Fungi;p__Ascomycota;c__Eurotiomycetes;o__Eurotiales;f__Aspergillaceae;g__Aspergillus;s__Aspergillus_aculeatus;	Aspergillus aculeatus	20	Pathotroph	Plant Pathogen	Probable	Microfungus	NULL	NULL	http://www.apsnet.org/publications/commonnames/Pages/default.aspx
Batcheloromyces_alistairii	k__Fungi;p__Ascomycota;c__Dothideomycetes;o__Capnodiales;f__Teratosphaeriaceae;g__Batcheloromyces;s__Batcheloromyces_alistairii;	Batcheloromyces	13	Pathotroph	Plant Pathogen	Probable	NULL	NULL	NULL	Tedersoo L, et al. 2014. Science 346:1256688
Bipolaris_sorokiniana	k__Fungi;p__Ascomycota;c__Dothideomycetes;o__Pleosporales;f__Pleosporaceae;g__Bipolaris;s__Bipolaris_sorokiniana;	Bipolaris	13	Pathotroph	Plant Pathogen	Probable	NULL	NULL	NULL	Tedersoo L, et al. 2014. Science 346:1256688
Bipolaris_variabilis	k__Fungi;p__Ascomycota;c__Dothideomycetes;o__Pleosporales;f__Pleosporaceae;g__Bipolaris;s__Bipolaris_variabilis;	Bipolaris	13	Pathotroph	Plant Pathogen	Probable	NULL	NULL	NULL	Tedersoo L, et al. 2014. Science 346:1256688
Bipolaris_victoriae	k__Fungi;p__Ascomycota;c__Dothideomycetes;o__Pleosporales;f__Pleosporaceae;g__Bipolaris;s__Bipolaris_victoriae;	Bipolaris	13	Pathotroph	Plant Pathogen	Probable	NULL	NULL	NULL	Tedersoo L, et al. 2014. Science 346:1256688
Bipolaris_zeicola	k__Fungi;p__Ascomycota;c__Dothideomycetes;o__Pleosporales;f__Pleosporaceae;g__Bipolaris;s__Bipolaris_zeicola;	Bipolaris	13	Pathotroph	Plant Pathogen	Probable	NULL	NULL	NULL	Tedersoo L, et al. 2014. Science 346:1256688
Blumeria_graminis	k__Fungi;p__Ascomycota;c__Leotiomycetes;o__Erysiphales;f__Erysiphaceae;g__Blumeria;s__Blumeria_graminis;	Blumeria	13	Pathotroph	Plant Pathogen	Probable	Microfungus	NULL	NULL	Tedersoo L, et al. 2014. Science 346:1256688
Calonectria_australiensis	k__Fungi;p__Ascomycota;c__Sordariomycetes;o__Hypocreales;f__Nectriaceae;g__Calonectria;s__Calonectria_australiensis;	Calonectria	13	Pathotroph	Plant Pathogen	Probable	NULL	NULL	NULL	Tedersoo L, et al. 2014. Science 346:1256688
Calonectria_clavata	k__Fungi;p__Ascomycota;c__Sordariomycetes;o__Hypocreales;f__Nectriaceae;g__Calonectria;s__Calonectria_clavata;	Calonectria	13	Pathotroph	Plant Pathogen	Probable	NULL	NULL	NULL	Tedersoo L, et al. 2014. Science 346:1256688
Calonectria_kyotensis	k__Fungi;p__Ascomycota;c__Sordariomycetes;o__Hypocreales;f__Nectriaceae;g__Calonectria;s__Calonectria_kyotensis;	Calonectria	13	Pathotroph	Plant Pathogen	Probable	NULL	NULL	NULL	Tedersoo L, et al. 2014. Science 346:1256688
Calostilbe_striispora	k__Fungi;p__Ascomycota;c__Sordariomycetes;o__Hypoceales;f__Catabotrydaceae;g__Calostilbe;s__Calostilbe_striispora;	Calostilbe	13	Pathotroph	Plant Pathogen	Probable	NULL	NULL	NULL	Tedersoo L, et al. 2014. Science 346:1256688
Castanediella_couratarii	k__Fungi;p__Ascomycota;c__Sordariomycetes;o__Xylariales;f__Xylariales_fam_Incertae_sedis;g__Castanediella;s__Castanediella_couratarii;	Castanediella	13	Pathotroph	Plant Pathogen	Probable	Micofungus	NULL	NULL	Crous PW, et al. 2015. Persoonia鈥?4:167-266 (http://doi.org/10.3767/003158515X688433)
Castanediella_eucalypticola	k__Fungi;p__Ascomycota;c__Sordariomycetes;o__Xylariales;f__Xylariales_fam_Incertae_sedis;g__Castanediella;s__Castanediella_eucalypticola;	Castanediella	13	Pathotroph	Plant Pathogen	Probable	Micofungus	NULL	NULL	Crous PW, et al. 2015. Persoonia鈥?4:167-266 (http://doi.org/10.3767/003158515X688433)
Claviceps_purpurea	k__Fungi;p__Ascomycota;c__Sordariomycetes;o__Hypocreales;f__Clavicipitaceae;g__Claviceps;s__Claviceps_purpurea;	Claviceps	13	Pathotroph	Plant Pathogen	Probable	NULL	NULL	NULL	Tedersoo L, et al. 2014. Science 346:1256688
Clonostachys_rosea	k__Fungi;p__Ascomycota;c__Sordariomycetes;o__Hypocreales;f__Bionectriaceae;g__Clonostachys;s__Clonostachys_rosea;	Clonostachys	13	Pathotroph	Plant Pathogen	Probable	NULL	NULL	NULL	Tedersoo L, et al. 2014. Science 346:1256688
Cornuvesica_falcata	k__Fungi;p__Ascomycota;c__Sordariomycetes;o__Ophiostomatales;f__Ophiostomataceae;g__Cornuvesica;s__Cornuvesica_falcata;	Ophiostomataceae	9	Pathotroph	Plant Pathogen	Probable	Microfungus	Blue-Staining	At least most species are transmitted via insect vectors, with mycelial colonies developing in bark-boring beetle galleries and spreading through the vascular system; they are highly specific to their beetle vectors. In some cases spores and mycelium are transmitted in specialized organs, termed mycangia (Cannon & Kirk 2007)	Cannon PF, Kirk PM. 2007. Fungal Families of the World. CAB International, Cambridge; Tedersoo L, et al. 2014. Science 346:1256688
Curvularia_inaequalis	k__Fungi;p__Ascomycota;c__Dothideomycetes;o__Pleosporales;f__Pleosporaceae;g__Curvularia;s__Curvularia_inaequalis;	Curvularia	13	Pathotroph	Plant Pathogen	Probable	NULL	NULL	NULL	Tedersoo L, et al. 2014. Science 346:1256688
Curvularia_lunata	k__Fungi;p__Ascomycota;c__Dothideomycetes;o__Pleosporales;f__Pleosporaceae;g__Curvularia;s__Curvularia_lunata;	Curvularia	13	Pathotroph	Plant Pathogen	Probable	NULL	NULL	NULL	Tedersoo L, et al. 2014. Science 346:1256688
Curvularia_nicotiae	k__Fungi;p__Ascomycota;c__Dothideomycetes;o__Pleosporales;f__Pleosporaceae;g__Curvularia;s__Curvularia_nicotiae;	Curvularia	13	Pathotroph	Plant Pathogen	Probable	NULL	NULL	NULL	Tedersoo L, et al. 2014. Science 346:1256688
Curvularia_soli	k__Fungi;p__Ascomycota;c__Dothideomycetes;o__Pleosporales;f__Pleosporaceae;g__Curvularia;s__Curvularia_soli;	Curvularia	13	Pathotroph	Plant Pathogen	Probable	NULL	NULL	NULL	Tedersoo L, et al. 2014. Science 346:1256688
Curvularia_spicifera	k__Fungi;p__Ascomycota;c__Dothideomycetes;o__Pleosporales;f__Pleosporaceae;g__Curvularia;s__Curvularia_spicifera;	Curvularia	13	Pathotroph	Plant Pathogen	Probable	NULL	NULL	NULL	Tedersoo L, et al. 2014. Science 346:1256688
Curvularia_verruculosa	k__Fungi;p__Ascomycota;c__Dothideomycetes;o__Pleosporales;f__Pleosporaceae;g__Curvularia;s__Curvularia_verruculosa;	Curvularia	13	Pathotroph	Plant Pathogen	Probable	NULL	NULL	NULL	Tedersoo L, et al. 2014. Science 346:1256688
Cylindrocladiella_lageniformis	k__Fungi;p__Ascomycota;c__Sordariomycetes;o__Hypocreales;f__Nectriaceae;g__Cylindrocladiella;s__Cylindrocladiella_lageniformis;	Cylindrocladiella	13	Pathotroph	Plant Pathogen	Probable	NULL	NULL	NULL	Tedersoo L, et al. 2014. Science 346:1256688
Devriesia_strelitziicola	k__Fungi;p__Ascomycota;c__Dothideomycetes;o__Capnodiales;f__Teratosphaeriaceae;g__Devriesia;s__Devriesia_strelitziicola;	Devriesia	13	Pathotroph	Plant Pathogen	Probable	NULL	NULL	NULL	Tedersoo L, et al. 2014. Science 346:1256688
Edenia_gomezpompae	k__Fungi;p__Ascomycota;c__Dothideomycetes;o__Pleosporales;f__Pleosporaceae;g__Edenia;s__Edenia_gomezpompae;	Edenia	13	Pathotroph	Plant Pathogen	Probable	NULL	NULL	NULL	Tedersoo L, et al. 2014. Science 346:1256688
Exobasidium_camelliae	k__Fungi;p__Basidiomycota;c__Exobasidiomycetes;o__Exobasidiales;f__Exobasidiaceae;g__Exobasidium;s__Exobasidium_camelliae;	Exobasidium	13	Pathotroph	Plant Pathogen	Probable	NULL	NULL	NULL	Tedersoo L, et al. 2014. Science 346:1256688
Exserohilum_turcicum	k__Fungi;p__Ascomycota;c__Dothideomycetes;o__Pleosporales;f__Pleosporaceae;g__Exserohilum;s__Exserohilum_turcicum;	Exserohilum	13	Pathotroph	Plant Pathogen	Probable	NULL	NULL	NULL	Tedersoo L, et al. 2014. Science 346:1256688
Gibberella_acuminata	k__Fungi;p__Ascomycota;c__Sordariomycetes;o__Hypocreales;f__Nectriaceae;g__Gibberella;s__Gibberella_acuminata;	Gibberella	13	Pathotroph	Plant Pathogen	Probable	NULL	NULL	NULL	Tedersoo L, et al. 2014. Science 346:1256688
Gibberella_pulicaris	k__Fungi;p__Ascomycota;c__Sordariomycetes;o__Hypocreales;f__Nectriaceae;g__Gibberella;s__Gibberella_pulicaris;	Gibberella	13	Pathotroph	Plant Pathogen	Probable	NULL	NULL	NULL	Tedersoo L, et al. 2014. Science 346:1256688
Gibberella_zeae	k__Fungi;p__Ascomycota;c__Sordariomycetes;o__Hypocreales;f__Nectriaceae;g__Gibberella;s__Gibberella_zeae;	Gibberella	13	Pathotroph	Plant Pathogen	Probable	NULL	NULL	NULL	Tedersoo L, et al. 2014. Science 346:1256688
Glomosporium_amaranthi	k__Fungi;p__Basidiomycota;c__Ustilaginomycetes;o__Urocystidales;f__Glomosporiaceae;g__Glomosporium;s__Glomosporium_amaranthi;	Glomosporium	13	Pathotroph	Plant Pathogen	Probable	Facultative Yeast	NULL	NULL	Tedersoo L, et al. 2014. Science 346:1256688
Golovinomyces_orontii	k__Fungi;p__Ascomycota;c__Leotiomycetes;o__Erysiphales;f__Erysiphaceae;g__Golovinomyces;s__Golovinomyces_orontii;	Golovinomyces	13	Pathotroph	Plant Pathogen	Probable	NULL	NULL	NULL	Tedersoo L, et al. 2014. Science 346:1256688
Graphilbum_fragrans	k__Fungi;p__Ascomycota;c__Sordariomycetes;o__Ophiostomatales;f__Ophiostomataceae;g__Graphilbum;s__Graphilbum_fragrans;	Ophiostomataceae	9	Pathotroph	Plant Pathogen	Probable	Microfungus	Blue-Staining	At least most species are transmitted via insect vectors, with mycelial colonies developing in bark-boring beetle galleries and spreading through the vascular system; they are highly specific to their beetle vectors. In some cases spores and mycelium are transmitted in specialized organs, termed mycangia (Cannon & Kirk 2007)	Cannon PF, Kirk PM. 2007. Fungal Families of the World. CAB International, Cambridge; Tedersoo L, et al. 2014. Science 346:1256688
Helicobasidium_purpureum	k__Fungi;p__Basidiomycota;c__Pucciniomycetes;o__Helicobasidiales;f__Helicobasidiaceae;g__Helicobasidium;s__Helicobasidium_purpureum;	Helicobasidium	13	Pathotroph	Plant Pathogen	Probable	NULL	NULL	NULL	http://www.apsnet.org/publications/commonnames/Pages/default.aspx
Hortaea_acidophila	k__Fungi;p__Ascomycota;c__Dothideomycetes;o__Dothideales;f__Dothideales_fam_Incertae_sedis;g__Hortaea;s__Hortaea_acidophila;	Hortaea	13	Pathotroph	Plant Pathogen	Probable	NULL	NULL	NULL	Tedersoo L, et al. 2014. Science 346:1256688
Huntiella_tribiliformis	k__Fungi;p__Ascomycota;c__Sordariomycetes;o__Microascales;f__Ceratocystidaceae;g__Huntiella;s__Huntiella_tribiliformis;	Huntiella	13	Pathotroph	Plant Pathogen	Probable	Microfungus	NULL	This genus used to belong to Ceratocystis; usually found associated with tree wounds or fresh cuts	de Errasti A, et al. 2015. Mycologia 107:512-521
Kohlmeyeriopsis_medullaris	k__Fungi;p__Ascomycota;c__Sordariomycetes;o__Magnaporthales;f__Magnaporthaceae;g__Kohlmeyeriopsis;s__Kohlmeyeriopsis_medullaris;	Magnaporthaceae	9	Pathotroph	Plant Pathogen	Probable	Microfungus	NULL	Species in this family cause rice blast and take-all; Usually necrotrophic on roots (Cannon & Kirk 2007)	Cannon PF, Kirk PM. 2007. Fungal Families of the World. CAB International, Cambridge
Laetisaria_arvalis	k__Fungi;p__Basidiomycota;c__Agaricomycetes;o__Corticiales;f__Corticiaceae;g__Laetisaria;s__Laetisaria_arvalis;	Laetisaria	13	Pathotroph	Plant Pathogen	Probable	Corticioid	NULL	NULL	Tedersoo L, et al. 2014. Science 346:1256688
Laetisaria_fuciformis	k__Fungi;p__Basidiomycota;c__Agaricomycetes;o__Corticiales;f__Corticiaceae;g__Laetisaria;s__Laetisaria_fuciformis;	Laetisaria	13	Pathotroph	Plant Pathogen	Probable	Corticioid	NULL	NULL	Tedersoo L, et al. 2014. Science 346:1256688
Lasiodiplodia_iraniensis	k__Fungi;p__Ascomycota;c__Dothideomycetes;o__Botryosphaeriales;f__Botryosphaeriaceae;g__Lasiodiplodia;s__Lasiodiplodia_iraniensis;	Lasiodiplodia	13	Pathotroph	Plant Pathogen	Probable	NULL	NULL	NULL	Tedersoo L, et al. 2014. Science 346:1256688
Lasiodiplodia_theobromae	k__Fungi;p__Ascomycota;c__Dothideomycetes;o__Botryosphaeriales;f__Botryosphaeriaceae;g__Lasiodiplodia;s__Lasiodiplodia_theobromae;	Lasiodiplodia	13	Pathotroph	Plant Pathogen	Probable	NULL	NULL	NULL	Tedersoo L, et al. 2014. Science 346:1256688
Leptosphaeria_sclerotioides	k__Fungi;p__Ascomycota;c__Dothideomycetes;o__Pleosporales;f__Leptosphaeriaceae;g__Leptosphaeria;s__Leptosphaeria_sclerotioides;	Leptosphaeria	13	Pathotroph	Plant Pathogen	Probable	NULL	NULL	NULL	Tedersoo L, et al. 2014. Science 346:1256688
Magnaporthe_grisea	k__Fungi;p__Ascomycota;c__Sordariomycetes;o__Magnaporthales;f__Magnaporthaceae;g__Magnaporthe;s__Magnaporthe_grisea;	Magnaporthe	13	Pathotroph	Plant Pathogen	Probable	Microfungus	NULL	Species in this genus cause rice blast and take-all; Usually necrotrophic on roots (Cannon & Kirk 2007)	Cannon PF, Kirk PM. 2007. Fungal Families of the World. CAB International, Cambridge; Tedersoo L, et al. 2014. Science 346:1256688
Medeolaria_farlowii	k__Fungi;p__Ascomycota;c__Pezizomycotina_cls_Incertae_sedis;o__Medeolariales;f__Medeolariaceae;g__Medeolaria;s__Medeolaria_farlowii;	Medeolaria	13	Pathotroph	Plant Pathogen	Probable	NULL	NULL	NULL	Tedersoo L, et al. 2014. Science 346:1256688
Meira_argovae	k__Fungi;p__Basidiomycota;c__Exobasidiomycetes;o__Exobasidiales;f__Brachybasidiaceae;g__Meira;s__Meira_argovae;	Brachybasidiaceae	9	Pathotroph	Plant Pathogen	Probable	Microfungus	NULL	Biotrophic or necrotrophic on leaves of monocots, including palms, grasses, sedges, and Commelinaceae (Cannon & Kirk 2007)	Cannon PF, Kirk PM. 2007. Fungal Families of the World. CAB International, Cambridge
Meira_nashicola	k__Fungi;p__Basidiomycota;c__Exobasidiomycetes;o__Exobasidiales;f__Brachybasidiaceae;g__Meira;s__Meira_nashicola;	Brachybasidiaceae	9	Pathotroph	Plant Pathogen	Probable	Microfungus	NULL	Biotrophic or necrotrophic on leaves of monocots, including palms, grasses, sedges, and Commelinaceae (Cannon & Kirk 2007)	Cannon PF, Kirk PM. 2007. Fungal Families of the World. CAB International, Cambridge
Melampsora_epitea	k__Fungi;p__Basidiomycota;c__Pucciniomycetes;o__Pucciniales;f__Melampsoraceae;g__Melampsora;s__Melampsora_epitea;	Melampsoraceae	9	Pathotroph	Plant Pathogen	Probable	Microfungus	NULL	Biotrophic, heteroecious or autoecious - A prominent group of species produces aecia on conifer needles and telia or leaves of Salicaceae (Cannon & Kirk 2007)	Cannon PF, Kirk PM. 2007. Fungal Families of the World. CAB International, Cambridge
Microsphaera_juglandis	k__Fungi;p__Ascomycota;c__Leotiomycetes;o__Erysiphales;f__Erysiphaceae;g__Microsphaera;s__Microsphaera_juglandis;	Microsphaera	13	Pathotroph	Plant Pathogen	Probable	NULL	NULL	NULL	Tedersoo L, et al. 2014. Science 346:1256688
Moesziomyces_antarcticus	k__Fungi;p__Basidiomycota;c__Ustilaginomycetes;o__Ustilaginales;f__Ustilaginaceae;g__Moesziomyces;s__Moesziomyces_antarcticus;	Moesziomyces	13	Pathotroph	Plant Pathogen	Probable	Facultative Yeast	NULL	NULL	Tedersoo L, et al. 2014. Science 346:1256688
Monographella_nivalis	k__Fungi;p__Ascomycota;c__Sordariomycetes;o__Xylariales;f__Hyponectriaceae;g__Monographella;s__Monographella_nivalis;	Monographella	13	Pathotroph	Plant Pathogen	Probable	NULL	NULL	NULL	Tedersoo L, et al. 2014. Science 346:1256688
Monosporascus_cannonballus	k__Fungi;p__Ascomycota;c__Sordariomycetes;o__Xylariales;f__Diatrypaceae;g__Monosporascus;s__Monosporascus_cannonballus;	Monosporascus	13	Pathotroph	Plant Pathogen	Probable	NULL	NULL	NULL	http://www.apsnet.org/publications/commonnames/Pages/default.aspx
Neodeightonia_subglobosa	k__Fungi;p__Ascomycota;c__Dothideomycetes;o__Botryosphaeriales;f__Botryosphaeriaceae;g__Neodeightonia;s__Neodeightonia_subglobosa;	Neodeightonia	13	Pathotroph	Plant Pathogen	Probable	NULL	NULL	NULL	Tedersoo L, et al. 2014. Science 346:1256688
Penicillium_chrysogenum	k__Fungi;p__Ascomycota;c__Eurotiomycetes;o__Eurotiales;f__Aspergillaceae;g__Penicillium;s__Penicillium_chrysogenum;	Penicillium chrysogenum	20	Pathotroph	Plant Pathogen	Probable	Facultative Yeast	NULL	NULL	Nagy GL, et al. 2014. Nature Communications 5:4471; http://www.apsnet.org/publications/commonnames/Pages/default.aspx
Penicillium_expansum	k__Fungi;p__Ascomycota;c__Eurotiomycetes;o__Eurotiales;f__Aspergillaceae;g__Penicillium;s__Penicillium_expansum;	Penicillium expansum	20	Pathotroph	Plant Pathogen	Probable	NULL	NULL	NULL	http://www.apsnet.org/publications/commonnames/Pages/default.aspx
Peroneutypa_scoparia	k__Fungi;p__Ascomycota;c__Sordariomycetes;o__Xylariales;f__Diatrypaceae;g__Peroneutypa;s__Peroneutypa_scoparia;	Peroneutypa	13	Pathotroph	Plant Pathogen	Probable	NULL	NULL	NULL	Tedersoo L, et al. 2014. Science 346:1256688
Pesotum_piceae	k__Fungi;p__Ascomycota;c__Sordariomycetes;o__Ophiostomatales;f__Ophiostomataceae;g__Pesotum;s__Pesotum_piceae;	Pesotum	13	Pathotroph	Plant Pathogen	Probable	NULL	NULL	NULL	Tedersoo L, et al. 2014. Science 346:1256688
Pestalotiopsis_microspora	k__Fungi;p__Ascomycota;c__Sordariomycetes;o__Xylariales;f__Sporocadaceae;g__Pestalotiopsis;s__Pestalotiopsis_microspora;	Pestalotiopsis	13	Pathotroph	Plant Pathogen	Probable	NULL	NULL	NULL	Tedersoo L, et al. 2014. Science 346:1256688
Pestalotiopsis_vismiae	k__Fungi;p__Ascomycota;c__Sordariomycetes;o__Xylariales;f__Sporocadaceae;g__Pestalotiopsis;s__Pestalotiopsis_vismiae;	Pestalotiopsis	13	Pathotroph	Plant Pathogen	Probable	NULL	NULL	NULL	Tedersoo L, et al. 2014. Science 346:1256688
Phaeoacremonium_minimum	k__Fungi;p__Ascomycota;c__Sordariomycetes;o__Togniniales;f__Togniniaceae;g__Phaeoacremonium;s__Phaeoacremonium_minimum;	Phaeoacremonium	13	Pathotroph	Plant Pathogen	Probable	NULL	NULL	NULL	Tedersoo L, et al. 2014. Science 346:1256688
Phaeoacremonium_rubrigenum	k__Fungi;p__Ascomycota;c__Sordariomycetes;o__Togniniales;f__Togniniaceae;g__Phaeoacremonium;s__Phaeoacremonium_rubrigenum;	Phaeoacremonium	13	Pathotroph	Plant Pathogen	Probable	NULL	NULL	NULL	Tedersoo L, et al. 2014. Science 346:1256688
Phoma_herbarum	k__Fungi;p__Ascomycota;c__Dothideomycetes;o__Pleosporales;f__Didymellaceae;g__Phoma;s__Phoma_herbarum;	Phoma herbarum	20	Pathotroph	Plant Pathogen	Probable	Microfungus	NULL	NULL	http://www.apsnet.org/publications/commonnames/Pages/default.aspx
Pilidium_septatum	k__Fungi;p__Ascomycota;c__Leotiomycetes;o__Helotiales;f__Chaetomellaceae;g__Pilidium;s__Pilidium_septatum;	Pilidium	13	Pathotroph	Plant Pathogen	Probable	NULL	NULL	NULL	Tedersoo L, et al. 2014. Science 346:1256688
Plectosphaerella_cucumerina	k__Fungi;p__Ascomycota;c__Sordariomycetes;o__Glomerellales;f__Plectosphaerellaceae;g__Plectosphaerella;s__Plectosphaerella_cucumerina;	Plectosphaerella	13	Pathotroph	Plant Pathogen	Probable	NULL	NULL	NULL	Tedersoo L, et al. 2014. Science 346:1256688
Podosphaera_macrospora	k__Fungi;p__Ascomycota;c__Leotiomycetes;o__Erysiphales;f__Erysiphaceae;g__Podosphaera;s__Podosphaera_macrospora;	Podosphaera	13	Pathotroph	Plant Pathogen	Probable	Microfungus	NULL	NULL	Tedersoo L, et al. 2014. Science 346:1256688
Ramichloridium_strelitziae	k__Fungi;p__Ascomycota;c__Dothideomycetes;o__Capnodiales;f__Dissoconiaceae;g__Ramichloridium;s__Ramichloridium_strelitziae;	Ramichloridium	13	Pathotroph	Plant Pathogen	Probable	NULL	NULL	NULL	Tedersoo L, et al. 2014. Science 346:1256688
Ramularia_vizellae	k__Fungi;p__Ascomycota;c__Dothideomycetes;o__Capnodiales;f__Mycosphaerellaceae;g__Ramularia;s__Ramularia_vizellae;	Ramularia	13	Pathotroph	Plant Pathogen	Probable	Microfungus	NULL	NULL	Tedersoo L, et al. 2014. Science 346:1256688
Readeriella_dimorphospora	k__Fungi;p__Ascomycota;c__Dothideomycetes;o__Capnodiales;f__Mycosphaerellaceae;g__Readeriella;s__Readeriella_dimorphospora;	Readeriella	13	Pathotroph	Plant Pathogen	Probable	NULL	NULL	NULL	Tedersoo L, et al. 2014. Science 346:1256688
Rhizophydium_sphaerotheca	k__Fungi;p__Chytridiomycota;c__Rhizophydiomycetes;o__Rhizophydiales;f__Rhizophydiaceae;g__Rhizophydium;s__Rhizophydium_sphaerotheca;	Rhizophydium	13	Pathotroph	Plant Pathogen	Probable	NULL	NULL	NULL	http://www.apsnet.org/publications/commonnames/Pages/default.aspx
Rickenella_fibula	k__Fungi;p__Basidiomycota;c__Agaricomycetes;o__Hymenochaetales;f__Rickenellaceae;g__Rickenella;s__Rickenella_fibula;	Rickenella	13	Pathotroph	Plant Pathogen	Probable	NULL	NULL	NULL	Tedersoo L, et al. 2014. Science 346:1256688
Sporendocladia_foliicola	k__Fungi;p__Ascomycota;c__Sordariomycetes;o__Microascales;f__Microascales_fam_Incertae_sedis;g__Sporendocladia;s__Sporendocladia_foliicola;	Sporendocladia	13	Pathotroph	Plant Pathogen	Probable	NULL	NULL	NULL	Tedersoo L, et al. 2014. Science 346:1256688
Stagonosporopsis_cucurbitacearum	k__Fungi;p__Ascomycota;c__Dothideomycetes;o__Pleosporales;f__Didymellaceae;g__Stagonosporopsis;s__Stagonosporopsis_cucurbitacearum;	Stagonosporopsis	13	Pathotroph	Plant Pathogen	Probable	NULL	NULL	NULL	http://www.apsnet.org/publications/commonnames/Pages/default.aspx
Stemphylium_lycopersici	k__Fungi;p__Ascomycota;c__Dothideomycetes;o__Pleosporales;f__Pleosporaceae;g__Stemphylium;s__Stemphylium_lycopersici;	Stemphylium lycopersici	20	Pathotroph	Plant Pathogen	Probable	NULL	NULL	NULL	http://www.apsnet.org/publications/commonnames/Pages/default.aspx
Thanatephorus_cucumeris	k__Fungi;p__Basidiomycota;c__Agaricomycetes;o__Cantharellales;f__Ceratobasidiaceae;g__Thanatephorus;s__Thanatephorus_cucumeris;	Thanatephorus	13	Pathotroph	Plant Pathogen	Probable	NULL	NULL	NULL	Tedersoo L, et al. 2014. Science 346:1256688
Trichothecium_roseum	k__Fungi;p__Ascomycota;c__Sordariomycetes;o__Hypocreales;f__Hypocreales_fam_Incertae_sedis;g__Trichothecium;s__Trichothecium_roseum;	Trichothecium	13	Pathotroph	Plant Pathogen	Probable	NULL	NULL	NULL	http://www.apsnet.org/publications/commonnames/Pages/default.aspx
Typhula_ishikariensis	k__Fungi;p__Basidiomycota;c__Agaricomycetes;o__Agaricales;f__Typhulaceae;g__Typhula;s__Typhula_ishikariensis;	Typhula	13	Pathotroph	Plant Pathogen	Probable	NULL	NULL	NULL	Tedersoo L, et al. 2014. Science 346:1256688 (doi:10.1126/science.1256688)
Urocystis_bolivarii	k__Fungi;p__Basidiomycota;c__Ustilaginomycetes;o__Urocystidales;f__Urocystidaceae;g__Urocystis;s__Urocystis_bolivarii;	Urocystis	13	Pathotroph	Plant Pathogen	Probable	Facultative Yeast	NULL	NULL	Tedersoo L, et al. 2014. Science 346:1256688 (doi:10.1126/science.1256688)
Venturia_polygoni-vivipari	k__Fungi;p__Ascomycota;c__Dothideomycetes;o__Venturiales;f__Venturiaceae;g__Venturia;s__Venturia_polygoni-vivipari;	Venturia	13	Pathotroph	Plant Pathogen	Probable	NULL	NULL	NULL	Tedersoo L, et al. 2014. Science 346:1256688 (doi:10.1126/science.1256688)
Veronaea_compacta	k__Fungi;p__Ascomycota;c__Eurotiomycetes;o__Chaetothyriales;f__Herpotrichiellaceae;g__Veronaea;s__Veronaea_compacta;	Veronaea	13	Pathotroph	Plant Pathogen	Probable	NULL	NULL	NULL	http://www.apsnet.org/publications/commonnames/Pages/default.aspx
Volutella_ciliata	k__Fungi;p__Ascomycota;c__Sordariomycetes;o__Hypocreales;f__Nectriaceae;g__Volutella;s__Volutella_ciliata;	Volutella	13	Pathotroph	Plant Pathogen	Probable	NULL	NULL	NULL	Tedersoo L, et al. 2014. Science 346:1256688 (doi:10.1126/science.1256688)
Volutella_consors	k__Fungi;p__Ascomycota;c__Sordariomycetes;o__Hypocreales;f__Nectriaceae;g__Volutella;s__Volutella_consors;	Volutella	13	Pathotroph	Plant Pathogen	Probable	NULL	NULL	NULL	Tedersoo L, et al. 2014. Science 346:1256688 (doi:10.1126/science.1256688)
Waitea_circinata	k__Fungi;p__Basidiomycota;c__Agaricomycetes;o__Cantharellales;f__Ceratobasidiaceae;g__Waitea;s__Waitea_circinata;	Waitea	13	Pathotroph	Plant Pathogen	Probable	NULL	NULL	NULL	Tedersoo L, et al. 2014. Science 346:1256688 (doi:10.1126/science.1256688)

## Sheet: Environmental variables
Variables	Unit
pH	-
Soil organic matter	g/kg
Total N	g/kg
Total P	g/kg
Total K	g/kg
Available N	mg/kg
Available P	mg/kg
Soil sand content	%
Soil silt content	%
Soil clay content	%
Available Fe	mg/kg
Available Mn	mg/kg
Exchangeable NA	mg/kg
Exchangeable Mg	mg/kg
Total exchangeable base	cmol/kg
Available B	mg/kg
Available S	mg/kg
Exchangeable H	cmol/kg
Exchangeable Al	cmol/kg
Total Cu	g/kg
Total Zn	g/kg
Total Fe	g/kg
Total Mn	g/kg
Total Na	g/kg
Total Ca	g/kg
Total Mg	g/kg
Altitude	m
Slope	-
Direction	-
Convexity	-

## Sheet: Env data
Species	pH	Soil organic matter	Total N	Total P	Total K	Available N	Available P	Soil sand content	Soil silt content	Soil clay content	Available Fe	Available Mn	Exchangeable NA	Exchangeable Mg	Total exchangeable base	Available B	Available S	Exchangeable H	Exchangeable Al	Total Cu	Total Zn	Total Fe	Total Mn	Total Na	Total Ca	Total Mg	Altitude	Slope	Direction	Convexity
Artocarpus_styracifolius	4.4823(0.0197)	35.0218(1.7785)	1.4874(0.0634)	0.0904(0.0041)	27.131(2.3291)	157.2501(5.0595)	0.9859(0.1226)	60.0526(1.2361)	26.6429(0.9433)	13.0087(0.5709)	68.1157(4.8533)	2.7649(0.3547)	13.3253(2.5978)	5.8513(0.2136)	0.465(0.0351)	0.2031(0.0164)	16.2653(1.3161)	0.3793(0.0143)	4.7645(0.2393)	1.5887(0.1042)	31.3913(1.1278)	11527.4585(685.1114)	55.4914(3.9511)	1579.5561(167.48)	198.4599(16.8571)	9.4218(0.5714)	535.2657(7.8965)	27.7992(1.9895)	152.4688(28.6635)	1.2735(0.3565)
Canarium_album	4.4918(0.0483)	32.4251(2.7513)	1.3254(0.0652)	0.1027(0.0034)	29.3808(1.5553)	139.5025(7.0108)	1.6608(0.2636)	64.8908(1.6301)	24.7666(0.8513)	9.9694(1.146)	64.2973(7.7283)	5.4411(1.2153)	12.82(3.9067)	7.8794(0.8181)	0.6263(0.0984)	0.1654(0.015)	22.1375(4.7221)	0.3917(0.0186)	4.409(0.3908)	2.2516(0.2674)	31.8248(1.7879)	11956.2735(825.989)	71.0581(9.7887)	1717.2693(132.1811)	252.4614(22.9053)	10.4244(0.5628)	508.1112(16.7916)	24.3448(2.3577)	153.7866(30.1172)	-0.6542(0.9931)
Castanopsis_fabri	4.5081(0.052)	37.7816(2.6885)	1.4765(0.0613)	0.1096(0.0062)	29.1089(1.3795)	137.7353(5.2075)	1.8298(0.2795)	63.5934(1.568)	24.7948(0.9269)	11.7232(1.2881)	67.2767(6.6908)	3.5211(0.9146)	10.4362(3.1393)	6.3708(0.4219)	0.4156(0.0307)	0.1808(0.0191)	16.9106(2.2381)	0.3935(0.0256)	5.109(0.1545)	2.2133(0.2626)	31.2867(1.3176)	11944.0716(549.5545)	71.955(11.2066)	1641.3448(126.0287)	210.5085(19.2529)	9.8576(0.4829)	576.3899(6.1188)	33.938(3.8156)	220.6341(35.5393)	1.0516(0.858)
Castanopsis_fissa	4.4012(0.0307)	34.1579(3.2918)	1.4514(0.0911)	0.1022(0.0035)	25.1366(2.2445)	153.9008(8.3068)	0.9602(0.1958)	59.231(1.7131)	25.2159(0.7263)	15.6496(1.2497)	69.4399(6.379)	2.7401(0.5334)	5.2149(0.483)	6.3831(0.2)	0.3704(0.0292)	0.1952(0.02)	18.1539(1.0738)	0.4772(0.0234)	5.1472(0.3381)	2.4535(0.2134)	34.08(1.1203)	13413.7893(333.4381)	57.2641(5.0416)	1333.6777(118.081)	174.7771(22.156)	11.4385(0.7762)	550.1387(16.8424)	31.4848(1.9817)	130.2214(27.7769)	-0.3531(0.7884)
Castanopsis_nigrescens	4.4173(0.0238)	36.8156(2.175)	1.4936(0.0787)	0.0936(0.0031)	26.6977(2.1608)	150.2415(6.6823)	1.3369(0.2123)	61.1274(1.0489)	25.1376(0.5848)	13.7719(0.8858)	80.1133(6.8584)	2.9478(0.4025)	14.1303(2.7088)	5.8733(0.3288)	0.4246(0.0216)	0.219(0.0163)	17.16(1.5969)	0.4761(0.0252)	5.2715(0.2681)	1.9244(0.3598)	34.3672(2.8344)	12024.4794(840.1466)	60.5847(4.7654)	1652.1517(171.1363)	199.2255(20.1319)	9.5204(0.5942)	573.0624(9.0693)	26.4229(1.4377)	210.0076(21.6255)	0.0707(0.4046)
Cryptocarya_concinna	4.4675(0.0267)	31.1148(1.7977)	1.2952(0.0635)	0.1042(0.0042)	30.6646(2.259)	137.0685(6.2554)	1.912(0.2927)	64.6703(1.9968)	24.8039(1.0211)	9.5067(0.9957)	70.3658(4.7706)	7.3772(2.1584)	9.8535(1.5355)	7.9467(0.909)	0.6646(0.1052)	0.1904(0.0119)	16.3144(1.6519)	0.3823(0.0161)	4.7815(0.2158)	2.0421(0.1383)	28.0125(0.9745)	11006.4923(658.3283)	78.9714(11.2371)	2059.2247(204.3954)	254.5248(26.9952)	10.3576(0.3045)	518.8821(8.1286)	27.1804(1.5898)	212.097(18.0656)	-0.8757(0.6312)
Cyclobalanopsis_bambusaefolia	4.423(0.0391)	39.9922(3.4139)	1.5945(0.1402)	0.1088(0.0044)	23.2525(3.2825)	149.3111(8.802)	1.1842(0.1545)	59.5388(1.858)	24.2767(1.1405)	15.5082(1.2275)	66.9264(5.1461)	2.9961(0.6006)	11.0091(3.999)	7.109(0.7926)	0.4465(0.0663)	0.187(0.0194)	18.9297(2.533)	0.4569(0.0313)	5.72(0.391)	1.4473(0.0733)	31.4686(1.7836)	12662.1951(1280.5667)	52.892(3.5681)	1515.1406(268.4095)	201.497(32.3383)	9.5902(0.7049)	568.8136(14.3231)	29.5608(2.4971)	151.1913(29.4563)	1.4042(0.8031)
Cyclobalanopsis_chungii	4.5346(0.031)	45.307(4.2881)	1.6313(0.1373)	0.1055(0.0048)	16.3204(4.0727)	153.1243(8.6491)	1.4703(0.141)	59.7096(2.3162)	24.2821(0.9181)	15.7185(2.0401)	75.2033(9.0238)	1.9334(0.4448)	9.2158(1.6331)	6.416(0.3323)	0.7758(0.1338)	0.1926(0.011)	17.0819(2.0823)	0.4075(0.0363)	5.7922(0.3454)	2.3811(0.2244)	30.8619(1.4383)	14141.3712(1389.0905)	42.1875(1.6696)	1299.5214(210.605)	282.4686(29.8732)	10.7141(0.8697)	579.0324(12.6306)	25.5093(1.7238)	161.4565(18.3833)	0.7479(0.6242)
Cyclobalanopsis_fleuryi	4.4321(0.064)	32.1389(1.6125)	1.3414(0.0756)	0.0889(0.0074)	32.4311(1.7948)	138.4318(3.1974)	1.4462(0.2828)	68.5254(1.4525)	22.2295(1.4533)	9.684(0.7073)	86.9611(13.6925)	3.5174(0.8198)	19.1303(4.2017)	5.7398(0.2383)	0.5213(0.0802)	0.1787(0.0373)	24.0263(4.0835)	0.4125(0.0316)	4.2922(0.3833)	1.5823(0.0452)	29.3252(2.3081)	10715.0679(549.8109)	67.7482(7.0834)	2183.0561(435.2251)	249.4909(21.6915)	8.9448(0.5502)	564.014(32.5065)	34.4827(4.0405)	256.9095(15.3984)	0.5682(1.1157)
Cyclobalanopsis_hui	4.5077(0.0342)	30.3864(2.9748)	1.2134(0.1242)	0.0898(0.0055)	30.4073(3.3311)	135.3732(9.2167)	1.516(0.2845)	66.4342(1.497)	22.4098(0.9289)	10.896(0.8186)	79.0955(12.3705)	7.3047(2.3749)	13.645(3.4726)	7.9105(1.1093)	0.6812(0.1238)	0.1767(0.0118)	12.1027(1.1878)	0.4597(0.0614)	4.611(0.496)	1.6292(0.1566)	26.0901(1.8811)	9583.6129(1100.671)	71.7624(11.3514)	2663.501(400.7035)	294.6195(32.8858)	9.3997(0.6885)	523.619(9.7606)	26.8954(1.4989)	157.8136(28.9517)	0.2152(0.6566)
Diospyros_morrisiana	4.5761(0.0344)	39.7137(3.083)	1.507(0.073)	0.1146(0.0054)	27.2998(1.154)	145.3322(5.9666)	1.8938(0.2324)	63.2351(1.2441)	24.6383(0.863)	11.5047(0.8111)	68.7101(6.8064)	3.1347(0.4984)	9.3432(1.8423)	7.3218(0.4396)	0.535(0.0584)	0.1764(0.0123)	13.0229(1.129)	0.3887(0.0234)	5.1252(0.2449)	2.5088(0.1923)	32.9795(0.9222)	12518.0167(742.0647)	66.0168(6.0419)	1805.3356(64.0133)	247.8965(17.5372)	10.7981(0.6153)	558.0265(16.8168)	31.8067(1.3886)	166.3663(25.6682)	0.4499(0.3843)
Elaeocarpus_sylvestris	4.4144(0.0469)	40.6081(2.6871)	1.6036(0.1047)	0.1017(0.0047)	22.9429(3.4904)	155.2243(5.3651)	1.47(0.2406)	60.9557(2.221)	24.1696(1.1735)	14.6069(1.6065)	78.1362(5.3493)	2.6569(0.6788)	11.6215(1.916)	6.2034(0.4308)	0.4965(0.0743)	0.1899(0.0166)	16.3254(1.4526)	0.4827(0.0463)	5.7059(0.4254)	1.9228(0.1845)	34.6462(1.7586)	13331.4789(1058.2565)	60.4111(10.615)	1614.7414(228.1555)	227.605(30.58)	9.5862(0.9125)	560.1169(13.6727)	27.763(1.8273)	179.5692(23.7752)	0.805(0.7514)
Engelhardtia_roxburghiana	4.4719(0.0531)	36.2155(1.9609)	1.5081(0.0652)	0.1061(0.0038)	29.3798(1.4498)	143.0029(4.6521)	1.9898(0.2285)	64.3611(1.3033)	23.872(0.8264)	11.6777(0.9786)	81.352(8.6586)	3.8206(1.0052)	8.3569(2.0433)	7.0453(0.5812)	0.4897(0.0829)	0.1746(0.0174)	16.0844(1.9672)	0.4229(0.0388)	5.1008(0.221)	2.0123(0.1776)	30.9102(0.9078)	11800.436(467.6843)	62.5102(6.25)	1792.0582(102.2197)	235.9013(30.4963)	9.7725(0.4892)	545.8715(13.2864)	35.6079(2.267)	243.4306(15.2015)	-0.6051(0.6017)
Lithocarpus_litseifolius	4.5563(0.0306)	45.8248(2.5278)	1.7035(0.0792)	0.1084(0.0031)	18.0788(2.3887)	152.3678(7.0256)	1.4632(0.1683)	59.7907(1.7349)	24.2173(1.1284)	15.0001(1.3577)	60.2916(4.3469)	2.0431(0.3658)	5.5635(0.6502)	6.6589(0.238)	0.7976(0.139)	0.1789(0.0147)	17.2119(1.4497)	0.3654(0.0325)	5.5489(0.1325)	2.3315(0.2115)	32.3553(0.6602)	13208.7768(841.6294)	54.0463(4.1937)	1366.185(212.182)	272.157(32.3666)	10.6621(0.7384)	601.3816(8.5729)	32.1446(2.1132)	142.0015(15.5609)	1.339(0.2881)
Lithocarpus_lohangwu	4.4687(0.0255)	30.5854(2.1276)	1.3012(0.0609)	0.0989(0.0027)	28.7982(1.6281)	134.3055(6.0857)	1.4545(0.1977)	63.2647(1.1623)	24.1784(0.7041)	12.7305(0.9449)	49.0769(3.9098)	3.4583(0.6692)	9.1231(1.4)	7.006(0.4941)	0.5715(0.0725)	0.1628(0.0111)	19.5187(2.4086)	0.3516(0.017)	4.853(0.3026)	2.2693(0.4613)	32.5219(1.3769)	12919.9926(912.448)	69.7391(5.9906)	1839.4474(100.2015)	257.5697(18.8248)	9.7412(0.4346)	510.0687(11.6915)	28.0781(1.5683)	195.9262(29.9985)	0.3213(0.9936)
Neolitsea_phanerophlebia	4.438(0.022)	35.0498(2.5376)	1.4025(0.0845)	0.0993(0.0045)	26.1429(1.3789)	152.6235(8.4885)	1.1386(0.2102)	62.5682(1.7413)	24.0764(0.7776)	13.3958(1.1961)	69.1708(4.2365)	3.1122(0.3327)	6.3284(2.1663)	6.9291(0.1806)	0.411(0.0351)	0.1817(0.01)	18.067(2.9102)	0.4491(0.0286)	5.2633(0.2466)	2.6862(0.4602)	31.8348(1.123)	12632.6085(606.7568)	65.5302(4.685)	1643.4812(117.4554)	222.0813(19.466)	11.2878(0.44)	566.0171(6.9191)	30.3597(1.8779)	158.6957(25.5205)	0.0919(0.4857)
Ormosia_glaberrima	4.5085(0.033)	35.557(1.8629)	1.4098(0.0946)	0.0952(0.0056)	26.6202(3.3005)	153.1736(9.2173)	1.4069(0.1533)	64.2042(1.4258)	23.4398(0.9376)	11.9744(1.1002)	76.0465(6.8322)	3.7305(0.7636)	11.3068(3.5219)	6.6826(0.3655)	0.4427(0.0387)	0.1868(0.0183)	13.6557(1.4771)	0.4245(0.032)	5.4381(0.4382)	1.8128(0.1192)	30.6415(2.1358)	10712.1161(808.2014)	54.4247(5.9931)	1917.0158(368.525)	225.8103(21.8159)	10.2633(0.877)	544.5673(14.4796)	28.1473(1.7832)	136.6188(17.8677)	1.4374(0.5426)
Ormosia_pachycarpa	4.4637(0.0238)	33.8181(2.0789)	1.3677(0.0669)	0.0871(0.0047)	25.9937(1.9594)	149.4501(4.6485)	1.2517(0.0956)	61.746(0.6051)	25.0522(0.5215)	13.1072(0.5127)	63.0435(3.2736)	2.3951(0.2587)	15.7728(2.9116)	5.8461(0.2267)	0.4867(0.0489)	0.2032(0.0206)	20.4553(2.9356)	0.4003(0.0326)	4.8616(0.2238)	1.7329(0.2072)	30.5676(1.4818)	10854.3628(492.3376)	51.1413(2.3183)	1526.7159(124.2495)	202.0462(15.2542)	9.8167(0.4107)	522.0497(8.9971)	28.9853(1.3785)	203.1683(24.1559)	0.5426(0.4174)
Schima_superba	4.4826(0.0447)	44.0386(2.9983)	1.5921(0.0934)	0.1073(0.0043)	17.7937(2.2968)	152.5811(8.7593)	1.3934(0.1618)	58.1592(1.8054)	24.8575(0.8026)	16.1193(1.24)	56.9156(3.9201)	1.9585(0.2803)	6.7094(0.8592)	6.0791(0.1868)	0.5851(0.0964)	0.2118(0.0196)	19.0391(1.2884)	0.4161(0.0287)	5.7958(0.2455)	2.0943(0.1667)	33.661(0.8655)	13726.2678(616.4588)	56.7875(4.1548)	1235.0791(109.4067)	227.855(34.3226)	9.9265(0.6683)	594.4333(9.7567)	30.9793(1.8086)	152.407(12.2327)	-0.0118(0.7637)
Notably,the value outside brackets is mean,with standard error within brackets.

## Sheet: Trait variables
Variables	Abbreviation	Unit
Leaf area	LA	cm2
Leaf area ratio	LAR	cm2 g−1
Leaf carbon content	LC	%
Leaf dry matter content	LDMC	g g−1
Leaf nitrogen content	LN	g kg−1
Leaf phosphorus content	LP	g kg−1
Specific leaf area	SLA	cm2 g−1
Specific stem length	SSL	cm g−1
Leaf thickness	T	cm
Fine-root diameter	DIAM	mm
Root branching intensity	RBI	tips
Root nitrogen content	RN	g kg−1
Root phosphorus content	RP	g kg−1
Root tissue density	RTD	g cm−3
Specific root area	SRA	cm2 g−1
Specific root length	SRL	cm g−1

## Sheet: Trait data
Species	LA	LAR	LC	LDMC	LN	LP	SLA	SSL	T	DIAM	RBI	RN	RP	RTD	SRA	SRL	Sample.size
Artocarpus_styracifolius	17.93	73.62	37.96	0.32	19.68	0.64	252.12	74.72	0.15	0.54	1.98	17.66	1.16	0.31	249.9	1487.55	4
Canarium_album	13.61	129.5	40.85	0.31	23.67	1.05	369.96	60.36	0.11	0.44	2.12	9.48	0.44	0.26	403.25	2982.21	4
Castanopsis_fabri	17.18	54.87	41.6	0.39	19.03	0.58	168.17	28.94	0.16	0.64	2.15	10.07	0.4	0.46	176.56	1126.18	4
Castanopsis_fissa	44.2	78.76	43.34	0.39	15.85	0.51	204.36	28.55	0.11	0.51	2.06	12.84	1.42	0.5	186.37	1292.67	4
Castanopsis_nigrescens	23.87	35.18	40.59	0.48	11.83	0.43	117.02	18.62	0.18	0.52	1.97	7.78	0.37	0.57	142.59	924.65	4
Cryptocarya_concinna	9.67	73.62	47.05	0.37	21.97	0.59	172.22	30.08	0.18	0.72	1.21	19.97	0.69	0.3	200.07	920.43	5
Cyclobalanopsis_bambusaefolia	13.89	68.71	40.92	0.41	19.65	0.41	195.45	37.11	0.14	0.48	2.27	13.8	0.6	0.4	228.01	1734.99	5
Cyclobalanopsis_chungii	21.24	46.61	42.92	0.51	14.6	0.39	135.55	21.93	0.16	0.49	1.5	7.43	0.74	0.62	148.06	993.4	4
Diospyros_morrisiana	14.88	85.32	37.82	0.28	16.96	0.51	254.31	50.37	0.17	0.58	1.18	14.96	1.04	0.24	305.61	1763.78	4
Elaeocarpus_sylvestris	11.23	77.88	38.22	0.42	14.91	0.61	166.51	62.19	0.14	0.49	1.89	13.39	0.95	0.44	197.05	1324.19	5
Engelhardtia_roxburghiana	30.86	75.27	42.7	0.38	20.08	0.56	207.4	34.22	0.14	0.44	2.58	13.53	0.95	0.35	292.87	2397.06	5
Lithocarpus_litseifolius	13.65	45.55	41.45	0.49	15.07	0.46	123.44	20.34	0.22	0.56	1.63	9.71	0.26	0.47	159.14	936.12	4
Neolitsea_phanerophlebia	15.51	61.93	43.78	0.45	20.24	0.56	161.38	33.86	0.14	0.79	1.03	21.62	0.74	0.27	192.78	819.68	4
Ormosia_glaberrima	11.47	33.66	44.8	0.44	21.8	0.64	187.11	19.69	0.17	0.69	1.76	16.57	0.53	0.51	116.5	540.82	4
Ormosia_pachycarpa	24.17	59.38	42.22	0.43	24.82	0.7	195.92	43.66	0.18	0.74	1.64	26.88	0.93	0.19	283.38	1223.26	4
Schima_superba	20.85	78.39	42.05	0.37	14.1	0.46	169.59	23.98	0.15	0.45	1.92	7.5	0.4	0.41	247.2	1996.85	4
Notably, the table shows the mean value of functional traits and the sample size, extracted from Coordination of leaf, stem and root traits in determining seedling mortality in a subtropical forest. Forest Ecology and Management. Shen Y, Umaña M N, Li W, Fang M, Chen Y, Lu H, Yu S 2019.
